# Supplementary material for: Nine years of warming and nitrogen addition in the Tibetan grassland promoted loss of soil organic carbon but did not alter the bulk change of chemical structure
Source: Copernicus journal article supplement (doi:10.5194/bg-2023-123), 2023-09-01
Supplement: Supplementary file 1 [file bg-2023-123-supplement.pdf]

Table S1 Basic chemical and physical properties in soils (0-10 cm) under different N enrichment levels and warming treatment (mean  $\pm$  SD, n = 6)

| Treatment                | Bulk density (g cm <sup>-3</sup> ) |               | pH            |               | AGB (g m <sup>-2</sup> ) |                   | SOC stock (Mg ha <sup>-1</sup> ) |                 | C/N            |                | MBC (mg g <sup>-1</sup> ) |               | EnC (nmol activity g <sup>-1</sup> dry soil h <sup>-1</sup> ) |                  |
|--------------------------|------------------------------------|---------------|---------------|---------------|--------------------------|-------------------|----------------------------------|-----------------|----------------|----------------|---------------------------|---------------|---------------------------------------------------------------|------------------|
|                          | C                                  | W             | C             | W             | C                        | W                 | C                                | W               | C              | W              | C                         | W             | C                                                             | W                |
| N0                       | 0.9 $\pm$ 0.1                      | 0.9 $\pm$ 0.1 | 6.1 $\pm$ 0.1 | 6.2 $\pm$ 0.3 | 442.3 $\pm$ 53.1         | 446.7 $\pm$ 141.7 | 78.5 $\pm$ 10.7                  | 65.6 $\pm$ 7.1  | 12.8 $\pm$ 0.2 | 13.1 $\pm$ 0.4 | 2.1 $\pm$ 0.2             | 1.2 $\pm$ 0.2 | 334.5 $\pm$ 13.3                                              | 275.8 $\pm$ 27.1 |
| N1                       | 1.1 $\pm$ 0.1                      | 1.0 $\pm$ 0.2 | 6.1 $\pm$ 0.1 | 6 $\pm$ 0.1   | 505 $\pm$ 43.7           | 367.2 $\pm$ 78.5  | 95.7 $\pm$ 4.3                   | 69.3 $\pm$ 18.8 | 12.7 $\pm$ 0.4 | 11.5 $\pm$ 1   | 1.7 $\pm$ 0.4             | 1.6 $\pm$ 0.2 | 676.2 $\pm$ 63.4                                              | 392.2 $\pm$ 42.7 |
| N2                       | 1.2 $\pm$ 0.1                      | 1.0 $\pm$ 0.1 | 5.7 $\pm$ 0.2 | 5.3 $\pm$ 0.2 | 457.3 $\pm$ 55           | 329.4 $\pm$ 74.9  | 93.2 $\pm$ 6.6                   | 69.0 $\pm$ 7.3  | 12.4 $\pm$ 0.1 | 12.2 $\pm$ 0.2 | 1.9 $\pm$ 0.2             | 1.3 $\pm$ 0.4 | 575.9 $\pm$ 64.2                                              | 453.9 $\pm$ 50   |
| N3                       | 1.1 $\pm$ 0.1                      | 0.9 $\pm$ 0.2 | 5.6 $\pm$ 0.2 | 5.3 $\pm$ 0.2 | 440.6 $\pm$ 118.6        | 420.5 $\pm$ 119.1 | 78.8 $\pm$ 5.9                   | 68.0 $\pm$ 13.1 | 11.9 $\pm$ 0.3 | 11.9 $\pm$ 0.4 | 1.3 $\pm$ 0.3             | 1.2 $\pm$ 0.2 | 472.7 $\pm$ 37.5                                              | 316.3 $\pm$ 29.8 |
| ANOVA <i>P</i> -values   |                                    |               |               |               |                          |                   |                                  |                 |                |                |                           |               |                                                               |                  |
| N input                  | 0.039                              |               | 0.000         |               | 0.000                    |                   | 0.000                            |                 | 0.000          |                | 0.000                     |               | 0.000                                                         |                  |
| Warming                  | 0.001                              |               | 0.001         |               | 0.000                    |                   | 0.000                            |                 | 0.026          |                | 0.005                     |               | 0.000                                                         |                  |
| N input $\times$ Warming | 0.180                              |               | 0.003         |               | 0.000                    |                   | 0.000                            |                 | 0.003          |                | 0.385                     |               | 0.000                                                         |                  |

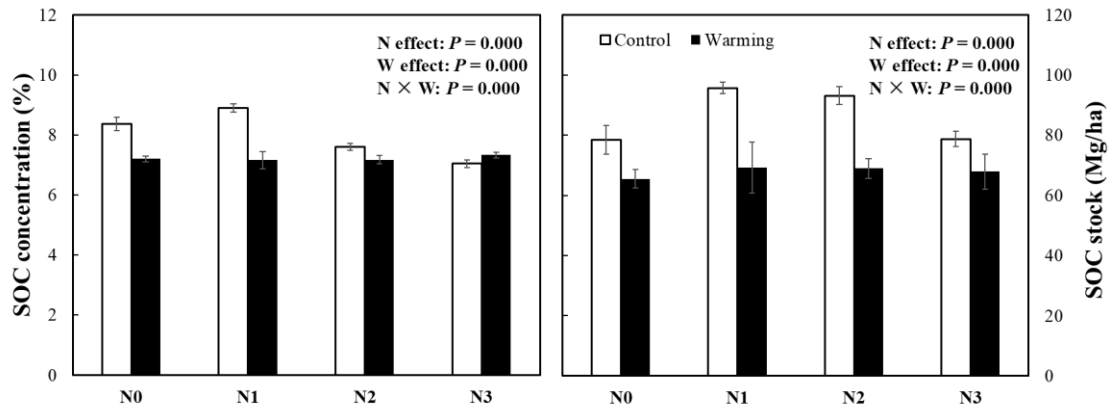

**Figure S1 SOC concentration and SOC stock (0-10 cm) under different N enrichment levels and warming treatment (mean  $\pm$  SD, n = 6)**

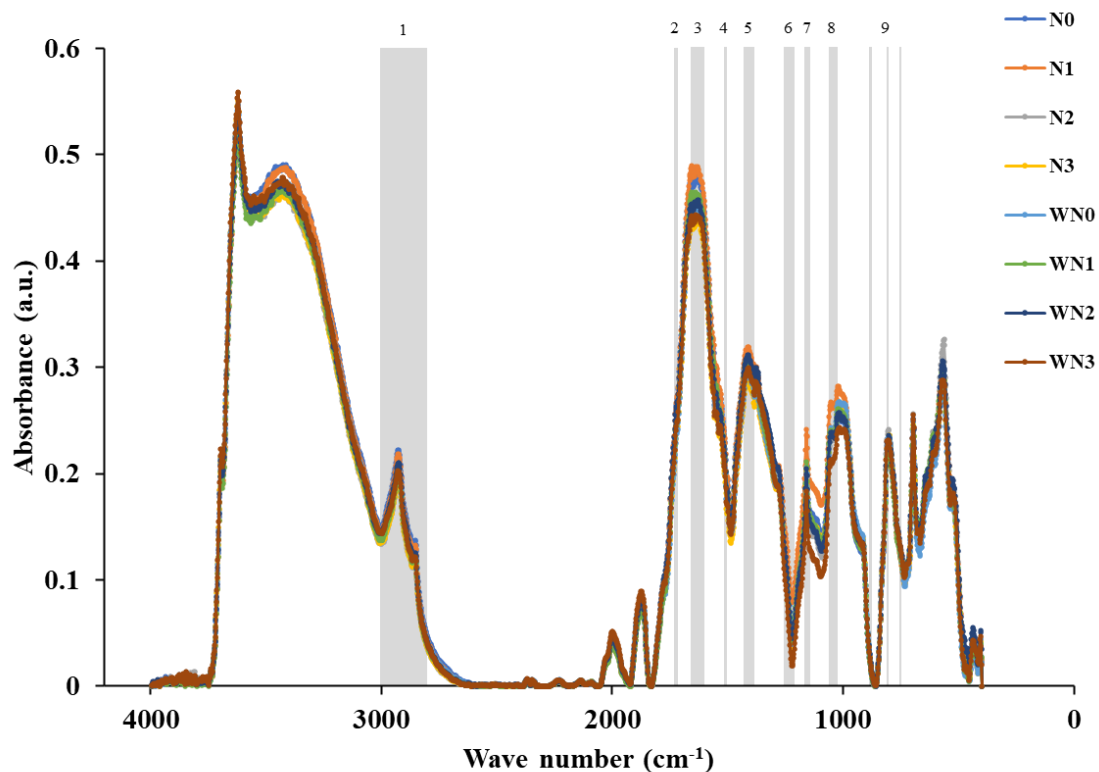

**Figure S2 The absorption bands identifiable by diffuse reflectance infrared Fourier transform (DRIFT) spectroscopy (0-10 cm, mean, n = 6)**

Note: 1: 3000–2800 cm<sup>-1</sup> aliphatic C–H, 2: 1735–1720 cm<sup>-1</sup> aromatic esters, carbonyl/carboxyl C=O, 3: 1660–1600 cm<sup>-1</sup> aromatic C=C, 4: 1515–1500 cm<sup>-1</sup> lignin like residues, 5: 1430–1380 cm<sup>-1</sup> aromatic C=C, 6: 1260–1210 cm<sup>-1</sup> phenolic/cellulose, 7: 1170–1148 cm<sup>-1</sup>, C–O bonds of poly-alcoholic and ether groups, 8: 1060–1020 cm<sup>-1</sup> aliphatic C–O – and alcohol C–O, 9: 880, 805, 745 cm<sup>-1</sup> C–H aromatic.

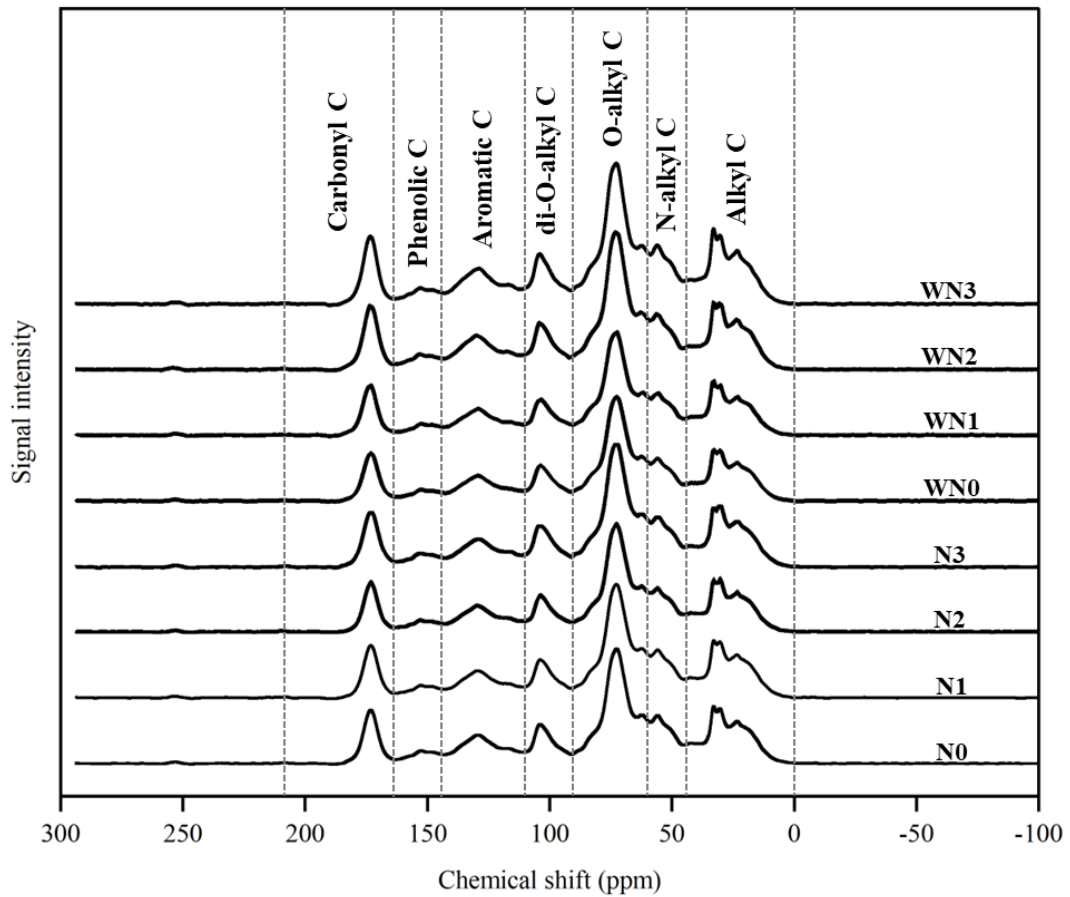

**Figure S3 Carbon-13 CPMAS NMR spectra of HF-treated soils (0–10 cm) under N enrichment and warming in the Tibetan grassland (mean, n = 6)**

Note: alkyl C (0–45 ppm); N-alkyl C (45–60 ppm); O-alkyl C (60–90 ppm); di-O-alkyl C (90–110 ppm); aromatic C (110–145 ppm); phenolic C (145–165 ppm); carbonyl C (165–210 ppm).
